# Supplementary material
Source: PubMed Central journal article supplement (PMC4650588)
Supplement: cr2014160x1.pdf [file cr2014160x1.pdf]

## Supplemental information, Table S1

**Table S1** Summary of testis transplantation experiments

| SSCs                                           | Experiment      | Number of recipient mice | Genetic background of recipient mice | Percentage of haploid cells from donor SSCs |
|------------------------------------------------|-----------------|--------------------------|--------------------------------------|---------------------------------------------|
| <i>RFP</i> -SSCs carrying mutant <i>EGFP</i> * | 1 <sup>st</sup> | 4                        | B6D2F1                               | 20.7%                                       |
|                                                | 2 <sup>nd</sup> | 4                        | B6D2F1                               | 42.7%                                       |
| <i>EGFP</i> -m <i>Crygc</i> -SSCs*             | 1 <sup>st</sup> | 2                        | B6D2F1                               | 32.4%                                       |
|                                                | 2 <sup>nd</sup> | 1                        | B6D2F1                               | 16.8%                                       |
|                                                | 3 <sup>rd</sup> | 3                        | B6D2F1                               | 19.7%                                       |
|                                                | 4 <sup>th</sup> | 5                        | B6D2F1                               | 20.3%                                       |
|                                                | 5 <sup>th</sup> | 4                        | B6D2F1                               | 23.3%                                       |
| Line-NHEJ-4**                                  | 1 <sup>st</sup> | 2                        | C57BL/6<br>(EGFP homo)               | 27.6%                                       |
| Line-NHEJ-9***                                 | 1 <sup>st</sup> | 3                        | C57BL/6<br>(EGFP homo)               | 18.8%                                       |
|                                                | 2 <sup>nd</sup> | 3                        | C57BL/6<br>(EGFP homo)               | 25.4%                                       |
| Line-HDR1-8****                                | 1 <sup>st</sup> | 2                        | C57BL/6<br>(EGFP homo)               | 3.6%                                        |
|                                                | 2 <sup>nd</sup> | 2                        | C57BL/6<br>(EGFP homo)               | 3.8%                                        |
|                                                | 3 <sup>rd</sup> | 4                        | C57BL/6<br>(EGFP homo)               | 37.1%                                       |
|                                                | 4 <sup>th</sup> | 1                        | C57BL/6<br>(EGFP homo)               | 33.6%                                       |
| Line-HDR1-11****                               | 1st             | 1                        | C57BL/6<br>(EGFP homo)               | 29.7%                                       |

\*: SSCs carrying different sequences of target genes.

\*\* : SSCs carrying modified but not repaired *Crygc*.

\*\*\*: SSCs carrying corrected *Crygc* gene via CRISPR-Cas9-mediated NHEJ repair.

\*\*\*\*: SSCs carrying corrected *Crygc* gene via CRISPR-Cas9-mediated HDR repair.
