# Supplementary material
Source: PubMed Central journal article supplement (PMC4650588)
Supplement: cr2014160x2.pdf [file cr2014160x2.pdf]

**Table S2** Summary of CRISPR-Cas9-mediated single gene editing in SSCs

| Target genes | Total tested colonies | Number of colonies carrying more than two mutant types | Number of colonies carrying monoallelic mutation | Number of colonies carrying biallelic mutation (Heterozygous) | Number of colonies carrying biallelic mutation (Homozygous) |
|--------------|-----------------------|--------------------------------------------------------|--------------------------------------------------|---------------------------------------------------------------|-------------------------------------------------------------|
| <i>Crygc</i> | 25                    | 3                                                      | 2                                                | 6                                                             | 10                                                          |
| <i>p53</i>   | 33                    | 5                                                      | 3                                                | 12                                                            | 8                                                           |
