# Supplementary material
Source: PubMed Central journal article supplement (PMC4650588)
Supplement: cr2014160x3.pdf [file cr2014160x3.pdf]

## Supplementary information, Table S3

**Table S3** Summary of CRISPR-Cas9-mediated editing in triple genes simultaneously

| Targeted genes        | Mutant alleles per colony / total colonies analyzed |      |      |      |      |      |      |
|-----------------------|-----------------------------------------------------|------|------|------|------|------|------|
|                       | 0                                                   | 1    | 2    | 3    | 4    | 5    | 6    |
| <i>Crygc+p53+Exo5</i> | 6/26                                                | 0/26 | 0/26 | 5/26 | 7/26 | 5/26 | 3/26 |
