# Supplementary material
Source: PubMed Central journal article supplement (PMC4650588)
Supplement: cr2014160x4.pdf [file cr2014160x4.pdf]

## Supplementary information, Table S4

**Table S4** Summary of SSC lines derived from expansion of single colonies or single

SSCs after CRISPR-Cas9-mediated gene correction of *mCrygc*

| Target gene   | Donor   | No. of picked colonies or SSCs for cell line derivation | No. of derived cell lines | No. of SSC lines with modified <i>mCrygc</i> | No. of SSC lines with biallelic NHEJ repair * | No. of SSC lines with biallelic NHEJ repair ** | No. of SSC lines with biallelic repair (HDR+NHEJ) | No. of SSC lines with biallelic HDR repair * |
|---------------|---------|---------------------------------------------------------|---------------------------|----------------------------------------------|-----------------------------------------------|------------------------------------------------|---------------------------------------------------|----------------------------------------------|
| <i>mCrygc</i> | -       | 24 colonies                                             | 21                        | 17                                           | 5                                             | 7                                              | -                                                 | -                                            |
| <i>mCrygc</i> | Oligo-1 | 27 colonies                                             | 23                        | 18                                           | 4                                             | 4                                              | 1                                                 | 2                                            |
| <i>mCrygc</i> | Oligo-2 | 16 colonies                                             | 13                        | 10                                           | 2                                             | 3                                              | 0                                                 | 1                                            |
| <i>mCrygc</i> | Oligo-1 | 480 cells                                               | 11                        | 8                                            | 1                                             | 2                                              | 2                                                 | 0                                            |

\*: Heterozygous

\*\* : Homozygous
