# Supplementary material
Source: PubMed Central journal article supplement (PMC4650588)
Supplement: cr2014160x5.pdf [file cr2014160x5.pdf]

**Table S5** The off-target analysis in cured SSC lines

| Potential off-target sites | Sequence*                       | Mutated SSC line (Total) |
|----------------------------|---------------------------------|--------------------------|
| Gm19385 (XR_108168)        | CCACAAG <u>CCCCAGTCCTGGAGAC</u> | 0 (15)                   |
| E17Rik (XR_108157)         | ACCAGAG <u>CCCCAGTCCTAACTCT</u> | 0 (15)                   |
| Plod1 (NM_011122)          | TGGGCAG <u>CCCCAGTCCTGGAGTG</u> | 0 (15)                   |
| Rnf145 (NM_026338)         | CTTCTGT <u>CCCCAGTCCTGGAAGC</u> | 0 (15)                   |
| D21RIK (NM_026338)         | AAATCAG <u>CCCCAGTCCTGGCAAC</u> | 0 (15)                   |
| Prkce (NM_011104)          | CC <u>CAGAGCCCCAGTCC</u> ATGTCC | 0 (15)                   |
| Dnahc17 (NM_001167746)     | TACAACCAG <u>CCTGGAAGG</u>      | 0 (15)                   |
| Chd9 (NM_177224)           | AGAAGAG <u>CCCCAGTCCTCTGAAG</u> | 0 (15)                   |
| ZFP592 (NM_178707)         | GTGGGAG <u>GCCAGTCCTGGAAG</u>   | 0 (15)                   |
| Herc2 (NM_010418)          | CC <u>CAGAGCCCCAGTCCTGGATG</u>  | 0 (15)                   |
| chr6:+51002808             | TACAGAG <u>CCCCAGTACTGGAGGG</u> | 0 (15)                   |
| chr16:+33725766            | TACTGAC <u>CCCCAGTCCTGGAAGG</u> | 0 (15)                   |
| chr5:-86298017             | TACACAGCTCCAGTCCTGGAGAG         | 0 (15)                   |
| chr1:+184866407            | TACACAG <u>CCCCAATCCTGGAGAG</u> | 0 (15)                   |
| chr12:+71129162            | TTCCGAGACCCAGTCCTGGACAG         | 0 (15)                   |
| chr17:+15421401            | GAAAGAGCCACAGTCCTGGACAG         | 0 (15)                   |
| chrX:-10991483             | GCTAGAG <u>CCCCAGTCCTGGACAG</u> | 0 (15)                   |
| chr7:-127342851            | TTCTGAGCTCCAGTCCTGGAGGG         | 0 (15)                   |
| chr4:-125232295            | ACCACAGTCCAGTCCTGGAAGG          | 0 (15)                   |
| chr5:-91121359             | TACTGAGTCCCGTCCTGGAAAG          | 0 (15)                   |
| chr5:-22473269             | TATGTAGCCACAGTCCTGGAGAG         | 0 (15)                   |

\*: 14 consecutive nucleotides of identity to the authentic target sequence are highlighted with underline.
