# Supplementary material
Source: PubMed Central journal article supplement (PMC4650588)
Supplement: cr2014160x6.pdf [file cr2014160x6.pdf]

**Table S6** Summary of whole genome sequencing (WGS) analysis

| Sample                               | Library index | Raw reads (M) | Raw bases (G) | Clean reads (M) | Clean bases (G) | Clean Rate (%) | Mapped reads (M) | Mapped bases (G) | Mapped ratio (%) | Unique mapped reads (M) | Unique mapped bases (G) | Unique mapped ratio (%) |
|--------------------------------------|---------------|---------------|---------------|-----------------|-----------------|----------------|------------------|------------------|------------------|-------------------------|-------------------------|-------------------------|
| <i>Crygc</i> <sup>-/-</sup> -4W-SSCs | 10            | 647.5         | 65.40         | 616.0           | 62.18           | 95.08          | 594.9            | 59.07            | 95.00            | 512.7                   | 51.18                   | 82.30                   |
| Line-HDR1-SC-8                       | 3             | 707.2         | 71.43         | 684.4           | 69.13           | 96.78          | 667.5            | 66.29            | 95.90            | 573.0                   | 57.18                   | 82.72                   |
