# Supplementary material
Source: PubMed Central journal article supplement (PMC4650588)
Supplement: cr2014160x13.pdf [file cr2014160x13.pdf]

## Supplementary information, Figure S1

*EGFP*-sgRNA: GGCGAGGGCGATGCCACCTA

|                       |                                                 |          |
|-----------------------|-------------------------------------------------|----------|
| <i>EGFP</i>           | CAGCGTGTCCGGCGAGGGCGAGGGCGATGCCACCTACGGCAAGCTG  |          |
|                       | CAGCGTGTCCGGCGAGGGCGAGGGCGATGCCA-CTACGGCAAGCTG  | -1 (×5)  |
|                       | CAGCGTGTCCGGCGAGGGCGAGGGCGATG----CTACGGCAAGCTG  | -4 (×2)  |
|                       | CAGCGTGTCCGGCGAGGGCGAGGGCGATGCC--CTACGGCAAGCTG  | -2 (×3)  |
|                       | CAGCGTGTCCGGCGAGGGCGAGGGCGATGCCAC--ACGGCAAGCTG  | -2 (×2)  |
| Mutant<br><i>EGFP</i> | CAGCGTGTCCGGCGAGGGCGAGGGCGATGCCAC----GGCAAGCTG  | -4 (×1)  |
|                       | CAGCGTGTCCGGCGAGGGCGAGG-----CTACGGCAAGCTG       | -10 (×1) |
|                       | CAGCGTGTCCGGCGAGGGCGAGGGCGCT-----ACGGCAAGCTG    | -7 (×2)  |
|                       | CAGCGTGTCCGGCGAGGGC-----CTACGGCAAGCTG           | -14 (×1) |
|                       | CAGCGTGTCCG-----CTACGGCAAGCTG                   | -22 (×1) |
|                       | CAGCGTGTCCGGCGAGGGCGAGGGCGATGCCACcCTACGGCAAGCTG | +1 (×3)  |

**Figure S1** The sequences of the *EGFP* transgene in mice carrying

CRISPR-Cas9-induced modifications. Deletions are indicated with (-), insertions are

indicated with (+). Small letter represents the inserted nucleotide.
