# Supplementary material
Source: PubMed Central journal article supplement (PMC4650588)
Supplement: cr2014160x14.pdf [file cr2014160x14.pdf]

## Supplementary information, Figure S2

**A**

**SSC colonies carrying mutated *Crygc***

|                                              |                                                  |         |
|----------------------------------------------|--------------------------------------------------|---------|
| <b>WT <i>Crygc</i></b>                       | AGTATCTGCTGAGGCCTCAAGAGTACCGGCGCTTCCAGGACTGGG    |         |
|                                              | AGTATCTGCTGAGGCCTCAAGA-TACCGGCGCTTCCAGGACTGGG    | -1 (×4) |
| <b>Biallelic mutation<br/>(Homozygous)</b>   | AGTATCTGCTGAGGCCT-----ACCGGCGCTTCCAGGACTGGG      | -7 (×1) |
|                                              | AGTATCTGCTGAGGCCTC-----TACCGGCGCTTCCAGGACTGGG    | -5 (×2) |
|                                              | AGTATCTGCTGAGGC-----TACCGGCGCTTCCAGGACTGGG       | -8 (×1) |
|                                              | AGTATCTGCTGAGGCCTCAAGAG † TACCGGCGCTTCCAGGACTGGG | +1 (×2) |
|                                              | AGTATCTGCTGAGGCCTCAAGAG † TACCGGCGCTTCCAGGACTGGG | +1      |
| <b>Biallelic mutation<br/>(Heterozygous)</b> | AGTATCTGCTGAGGCCTCAA-----ACCGGCGCTTCCAGGACTGGG   | 4       |
|                                              | AGTATCTGCTGAGGCCTCAAGA-TACCGGCGCTTCCAGGACTGGG    | -1      |
|                                              | AGTATCTGCTGAGGCCTC-----CAGGACTGGG                | -17     |

**B**

**Mice carrying mutant *Crygc* gene**

|                                    |                                                  |          |
|------------------------------------|--------------------------------------------------|----------|
| <b><i>Crygc</i></b>                | AGTATCTGCTGAGGCCTCAAGAGTACCGGCGCTTCCAGGACTGGG    |          |
|                                    | AGTATCTGCTGAGGCCTCAAGA-TACCGGCGCTTCCAGGACTGGG    | -1 (×2)  |
| <b>Functional<br/>mutation</b>     | AGTATCTGCTGAGGCCTCAAG--TACCGGCGCTTCCAGGACTGGG    | -2 (×1)  |
|                                    | AGTATCTGCTGAGGCCTCA----TACCGGCGCTTCCAGGACTGGG    | -4 (×2)  |
|                                    | AGTATCTGCTGAGGCCTCAAGA--ACCGGCGCTTCCAGGACTGGG    | -2 (×1)  |
|                                    | AGTATCTGCTGAG-----TACCGGCGCTTCCAGGACTGGG         | -10 (×1) |
|                                    | AGTATCTGC-----TACCGGCGCTTCCAGGACTGGG             | -14 (×1) |
|                                    | AGTATCTGCTGAGGCCTCAAGAG † TACCGGCGCTTCCAGGACTGGG | +1 (×2)  |
| <b>Non-functional<br/>mutation</b> | AGTATCTGCTGAGGCCTCAA---TACCGGCGCTTCCAGGACTGGG    | -3 (×2)  |
|                                    | AGTATCTGCTGAGGCCTC-----ACCGGCGCTTCCAGGACTGGG     | -6 (×1)  |

**Figure S2** The sequences of the *Crygc* gene in SSC colonies (**A**) and mice (**B**) carrying CRISPR-Cas9-induced modifications. Deletions are indicated with (-), insertions are indicated with (+). Small letters represent the inserted nucleotide.
