# Supplementary material
Source: PubMed Central journal article supplement (PMC4650588)
Supplement: cr2014160x15.pdf [file cr2014160x15.pdf]

## Supplementary information, Figure S3

**A**

**SSC colonies carrying mutated *p53***

|                                      |                                                      |         |
|--------------------------------------|------------------------------------------------------|---------|
| WT <i>p53</i>                        | TGGCTTCCACCTGGGCTTCCTGCAGTCTGGGACAGCCAAGTCTGTTATGT   |         |
| Biallelic mutation<br>(Homozygous)   | TGGCTTCCACCTGGGCTTCCTGC-GTCTGGGACAGCCAAGTCTGTTATGT   | -1 (×2) |
|                                      | TGGCTTCCACCTGGGCTTCCTG--GTCTGGGACAGCCAAGTCTGTTATGT   | -2 (×1) |
|                                      | TGGCTTCCACCTGGGCTTCCTGCAGT-TGGGACAGCCAAGTCTGTTATGT   | -1 (×1) |
|                                      | TGGCTTCCACCTGGGCTTCCTGCAGT----GACAGCCAAGTCTGTTATGT   | -4 (×1) |
|                                      | TGGCTTCCACCTGGGCTTCCTGCA aGTCTGGGACAGCCAAGTCTGTTATGT | +1 (×3) |
| Biallelic mutation<br>(Heterozygous) | TGGCTTCCACCTGGGCTTCCTGCA aGTCTGGGACAGCCAAGTCTGTTATGT | +1      |
|                                      | TGGCTTCCACCTGGGCTTCCTG--GTCTGGGACAGCCAAGTCTGTTATGT   | -2      |
|                                      | TGGCTTCCACCTGGGCTTCCTTG-----CAAGTCTGTTATGT           | -13     |
|                                      | TGGCTTCCACCTGGGCTTCCTGCA aGTCTGGGACAGCCAAGTCTGTTATGT | +1      |
|                                      | TGGCTTCCACCTGGGCTTCCTG--GTCTGGGACAGCCAAGTCTGTTATGT   | -2      |
|                                      | TGGCTTCCACCTGGGCTTCCTGC-----GGGACAGCCAAGTCTGTTATGT   | -5      |

**B**

**SSC colonies carrying triple mutations**

**Clone 2**

|              |                                                       |     |
|--------------|-------------------------------------------------------|-----|
|              | TGGCTTCCACCTGGGCTTCCTGCAGTCTGGGACAGCCAAGTCTGTTATGT    | WT  |
| <i>p53</i>   | TGGCTTCCACCTGGGCTTCCTGCA aGTCTGGGACAGCCAAGTCTGTTATGT  | +1  |
|              | TGGCTTCCACCTGGGCTTCCTG--GTCTGGGACAGCCAAGTCTGTTATGT    | -1  |
| <i>Crygc</i> | CTGCTGAGGCCTCAAGAGTACCGGCGCTTCCAGGACTGGGGCTCTGTAGATGC | WT  |
|              | CTGCTGAGGCCTCAAGAG--CCGGCGCTTCCAGGACTGGGGCTCTGTAGATGC | -2  |
|              | CTGCTGAGGCC-----GGCGCTTCCAGGACTGGGGCTCTGTAGATGC       | -11 |
| <i>Exo5</i>  | GAAAGGGGGATTGGATGTCTTGTCACCCATGGAGAGATTCCACCTGAA      | WT  |
|              | GAAAGGGGGATTGGATGTCTTGTCAACC-ATGGAGAGATTCCACCTGAA     | -1  |
|              | GAAAGGGGGATTGGATGTCTTGTCAACC-ATGGAGAGATTCCACCTGAA     | -1  |

**Clone 5**

|              |                                                       |      |
|--------------|-------------------------------------------------------|------|
|              | TGGCTTCCACCTGGGCTTCCTGCAGTCTGGGACAGCCAAGTCTGTTATGT    | WT   |
| <i>p53</i>   | TGGCTTCCACCTGGGCTTCCTGC-----GGGACAGCCAAGTCTGTTATGT    | -5   |
|              | TGGCTTCCACCTGGGCT-----GGGACAGCCAAGTCTGTTATGT          | -11  |
| <i>Crygc</i> | CTGCTGAGGCCTCAAGAGTACCGGCGCTTCCAGGACTGGGGCTCTGTAGATGC | WT   |
|              | CTGCTGAGGCCTCAAGAA--CCGGCGCTTCCAGGACTGGGGCTCTGTAGATGC | -3+1 |
|              | CTGCTGAGGCCTCAAGA-TACCGGCGCTTCCAGGACTGGGGCTCTGTAGATGC | -1   |
| <i>Exo5</i>  | GAAAGGGGGATTGGATGTCTTGTCACCCATGGAGAGATTCCACCTGAA      | WT   |
|              | GAAAGGGGGATTGGATGTCTTGTCAACC-ATGGAGAGATTCCACCTGAA     | -1   |
|              | GAAAGGGGGATTGGATGTCTTGTCA----TGGAGAGATTCCACCTGAA      | -4   |

**Figure S3** The sequences of the *p53* gene in SSC colonies (**A**) and the sequences of the *p53*, *Crygc* and *Exo5* genes in SSC colonies (**B**). Deletions are indicated with (-), insertions are indicated with (+). Small letter represents the inserted nucleotide.
