# Supplementary material
Source: PubMed Central journal article supplement (PMC4650588)
Supplement: cr2014160x16.pdf [file cr2014160x16.pdf]

## Supplementary information, Figure S4

*Crygc*<sup>-/-</sup> SSC colonies with NHEJ repair

|                                      |                                                 |         |
|--------------------------------------|-------------------------------------------------|---------|
| WT <i>Crygc</i>                      | AGTATCTGCTGAGGCCTCAAGAGTACCGGCCTTCCAGGACTGGG    |         |
| Mutant <i>Crygc</i>                  | AGTATCTGCTGAGGCCTCAAGAGTACCGGCCTTCCAGGACTGGG    |         |
| Biallelic mutation<br>(Homozygous)   | AGTATCTGCTGAGGCCTCAAGA-TACCGGCCTTCCAGGACTGGG    | -1 (×1) |
|                                      | AGTATCTGCTGAGGCCTCAAGAG-ACCGGCCTTCCAGGACTGGG    | -1 (×2) |
|                                      | AGTATCTGCTGAGGCCTCAAG--TACCGGCCTTCCAGGACTGGG    | -2 (×1) |
|                                      | AGTATCTGCTGAGGCCTCAA---TACCGGCCTTCCAGGACTGGG    | -3 (×1) |
|                                      | AGTATCTGCTGAGGC-----TACCGGCCTTCCAGGACTGGG       | -8 (×1) |
|                                      | AGTATCTGCTGAGGCCTCAAGAG t TACCGGCCTTCCAGGACTGGG | +1 (×2) |
| Biallelic mutation<br>(Heterozygous) | AGTATCTGCTGAGGCCTCAAGAG t TACCGGCCTTCCAGGACTGGG | +1      |
|                                      | AGTATCTGCTGAGGCCTCAA--GTACCGGCCTTCCAGGACTGGG    | -2      |
|                                      | AGTATCTGCTGAGGCCTCAAGAG t TACCGGCCTTCCAGGACTGGG | +1      |
|                                      | AGTATCTGCTGAGGCCTCAA-----ACGGCCTTCCAGGACTGGG    | -6+1    |

**Figure S4** The sequences of the *Crygc* gene in SSC lines generated from single SSC colonies derived from electroporation of *Crygc*-sgRNA into *Crygc*<sup>-/-</sup>-SSCs. Deletions are indicated with (-), insertions are indicated with (+). Small letter represents the inserted nucleotide.
