# Supplementary material
Source: PubMed Central journal article supplement (PMC4650588)
Supplement: cr2014160x17.pdf [file cr2014160x17.pdf]

## Supplementary information, Figure S5

**A** *Crygc*<sup>-/-</sup> -SSCs repaired with Oligo-1

|                     |                                                |          |
|---------------------|------------------------------------------------|----------|
| WT <i>Crygc</i>     | AGTACCGGCGCTTCCAGGACTGGGGCTCTGTAGATGCTAAGGCCG  |          |
| Mutant <i>Crygc</i> | AGTACCGGCCTTCCAGGACTGGGGCTCTGTAGATGCTAAGGCCG   |          |
| Biallelic mutation  | AGTACCGGCCTTCC-GGACTGGGGCTCTGTAGATGCTAAGGCCG   | -1 (×1)  |
|                     | AGTACCGGCCTTCC--GGACTGGGGCTCTGTAGATGCTAAGGCCG  | -2 (×1)  |
|                     | AGTACCGGCCTTCC-----CTGGGGCTCTGTAGATGCTAAGGCCG  | -5 (×1)  |
|                     | AGTACCGGCCTTCC-----GCTCTGTAGATGCTAAGGCCG       | -9 (×1)  |
|                     | AGTACCGGCCTTCCa AGGACTGGGGCTCTGTAGATGCTAAGGCCG | +1 (×2)  |
|                     | AGTACCGGCGCTTCCAGGACTGGGGCTCTGTAGATGCTAAGGCCG  | HDR (×2) |

**B** *Crygc*<sup>-/-</sup> -SSCs repaired with Oligo-2

|                     |                                                       |          |
|---------------------|-------------------------------------------------------|----------|
| WT <i>Crygc</i>     | GAGGCCTCAAGAGTACCGGCGCTTCCAGGACTGGGGCTCTGTAGA         |          |
| Mutant <i>Crygc</i> | GAGGCCTCAAGAGTACCGGCCTTCCAGGACTGGGGCTCTGTAGA          |          |
| Biallelic mutation  | GAGGCCTCAAGAGTACCGGCCTT---GGACTGGGGCTCTGTAGA          | -3 (×1)  |
|                     | GAGGCCTCAAGAGTACCGGCCTT-----ACTGGGGCTCTGTAGA          | -5 (×1)  |
|                     | GAG <u>ACC</u> CAAGAGTACCGGCGCTTCCAGGACTGGGGCTCTGTAGA | HDR (×1) |

**C** *Crygc*<sup>-/-</sup> -SSCs from single cells repaired with Oligo-1

|                     |                                                |         |
|---------------------|------------------------------------------------|---------|
| WT <i>Crygc</i>     | AGTACCGGCGCTTCCAGGACTGGGGCTCTGTAGATGCTAAGGCCG  |         |
| Mutant <i>Crygc</i> | AGTACCGGCCTTCCAGGACTGGGGCTCTGTAGATGCTAAGGCCG   |         |
| Biallelic mutation  | AGTACCGGCCTTCCa AGGACTGGGGCTCTGTAGATGCTAAGGCCG | +1 (×2) |

**Figure S5** The sequences of the *Crygc* gene in SSC lines generated from single SSC colonies derived from electroporation of exogenous Oligo-1 (**A**), Oligo-2 (**B**) into *Crygc*<sup>-/-</sup>-SSCs or single SSCs derived from electroporation of Oligo-1 (**C**) into *Crygc*<sup>-/-</sup>-4W-SSCs. Deletions are indicated with (-), insertions are indicated with (+). Small letter represents the inserted nucleotide. Letters highlighted with red underlines present synonymous mutations.
