# Supplementary material
Source: PubMed Central journal article supplement (PMC4650588)
Supplement: cr2014160x18.pdf [file cr2014160x18.pdf]

### Supplementary information, Figure S6

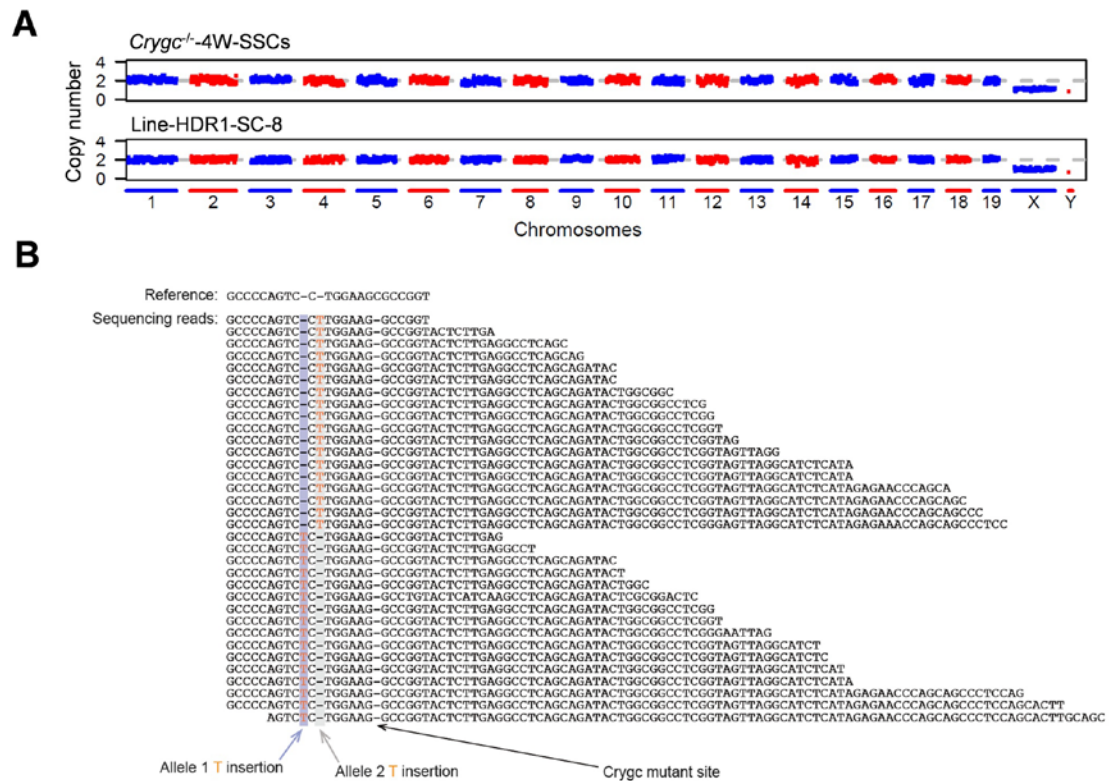

**Figure S6** CRISPR-Cas9-mediated gene editing rescued the mutant *Crygc* gene without causing CNVs. **(A)** Copy number of chromosomes in *Crygc*<sup>-/-</sup>-4W-SSCs and Line-HDR1-SC-8. **(B)** Mutant *Crygc* gene was repaired in Line-HDR1-SC-8 SSCs (sequences from complementary strand).
