# Supplementary material
Source: PubMed Central journal article supplement (PMC4650588)
Supplement: cr2014160x19.pdf [file cr2014160x19.pdf]

## Supplementary information, Figure S7

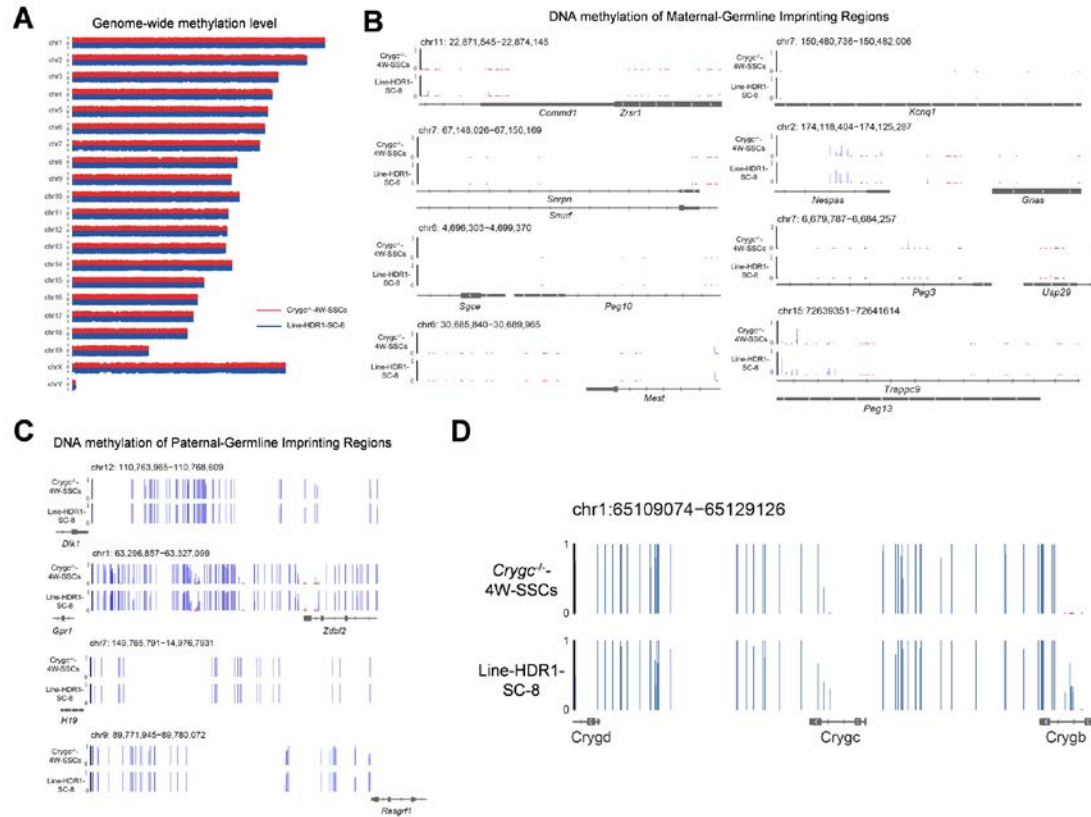

**Figure S7** DNA Methylation patterns were not disrupted by CRISPR-Cas9 system. **(A)** Line-HDR1-SC-8 SSCs were consistent with *Crygc*<sup>-/-</sup>-4W-SSCs on genome-wide DNA methylation levels. **(B, C)** All tested imprinted genes kept the typical paternal imprinting status in both Line-HDR1-SC-8 and its parental *Crygc*<sup>-/-</sup>-4W-SSCs. **(D)** The DNA methylation level of *Crygc* remains unchanged in both Line-HDR1-SC-8 and its parental *Crygc*<sup>-/-</sup>-4W-SSCs.
