# Supplementary material
Source: PubMed Central journal article supplement (PMC4650588)
Supplement: cr2014160x20.pdf [file cr2014160x20.pdf]

## Supplementary information, Figure S8

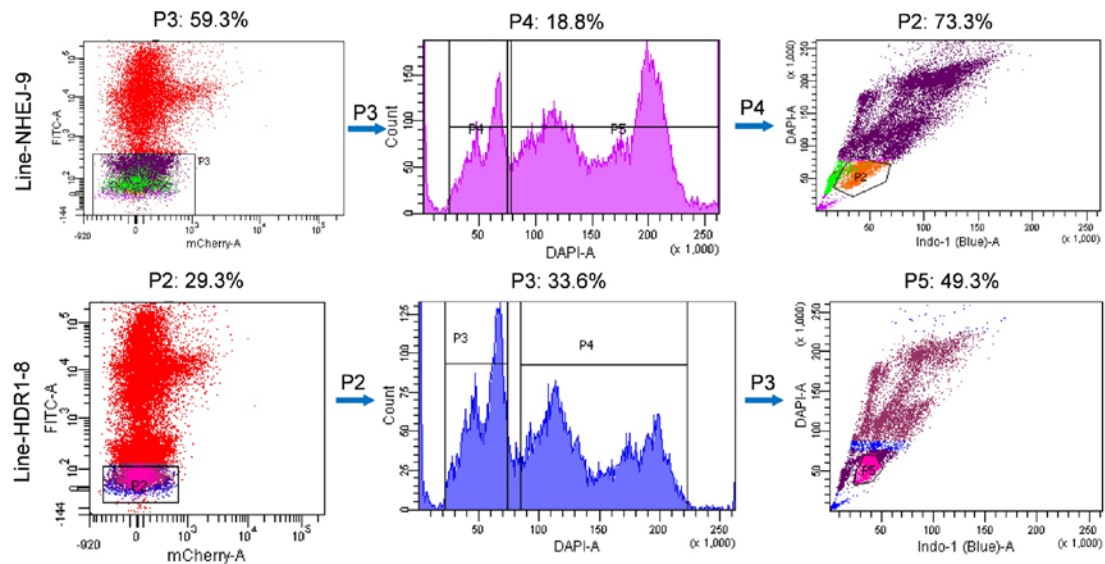

**Figure S8** Isolation of non-EGFP haploid cells from testis reconstituted by transplantation of SSCs from Line-NHEJ-9 (upper) and Line-HDR1-8 (bottom) into recipient testes of infertile males with homozygous *EGFP* marker for ROSI. EGFP-negative cells are sorted from reconstituted testis and haploid cells (RS) are further isolated from EGFP-negative cells according to DNA content (middle and right).
